# Supplementary material for: Dual-Responsive Amphiphilic P(DMAEMA-co-LMA-co-OEGMA) Terpolymer Nano-Assemblies in Aqueous Media
Source: MDPI journal article supplement (doi:10.3390/nano12213791), 2022-10-27
Supplement: s1 [file s1]

# Dual-Responsive Amphiphilic P(DMAEMA-co-LMA-co-OEGMA) Terpolymer Nano-Assemblies in Aqueous Media

Maria Tomara, Dimitrios Selianitis and Stergios Pispas \*

Theoretical and Physical Chemistry Institute, National Hellenic Research Foundation, 48 Vassileos  
Constantinou Avenue, 11635 Athens, Greece

\* Correspondence: pispas@eie.gr; Tel.: +30-210-727-3824

**Table S1.** Quantities of reagents used for the synthesis of P(DMAEMA-co-LMA-co-OEGMA) terpolymers.

| Sample | DMAEMA (mL) | LMA (mL) | OEGMA (mL) | CTA (mg) | AIBN (mg) |
|--------|-------------|----------|------------|----------|-----------|
| TER-1  | 1.29        | 0.23     | 0.58       | 28       | 3.3       |
| TER-2  | 1.29        | 0.23     | 0.58       | 56       | 6.6       |
| TER-3  | 0.67        | 0.72     | 0.815      | 28       | 3.3       |
| TER-4  | 0.45        | 1.21     | 0.61       | 28       | 3.3       |
| TER-5  | 0.9         | 0.48     | 0.82       | 28       | 3.3       |

**Table S2.** CAC values and  $I_1/I_3$  ratios for the statistical P(DMAEMA-co-LMA-co-OEGMA) terpolymer aggregates at 25 °C and 55 °C in aqueous solutions.

| Sample | pH    | $I_1/I_3$ |       | CAC                   |
|--------|-------|-----------|-------|-----------------------|
|        |       | 25 °C     | 55 °C |                       |
| TER-1  | pH 3  | 1.39      | 1.41  | –                     |
|        | PBS   | 1.17      | 1.24  | $9.24 \times 10^{-6}$ |
|        | pH 10 | 1.15      | 1.21  | $1.04 \times 10^{-5}$ |
| TER-2  | pH 3  | 1.38      | 1.35  | –                     |
|        | PBS   | 1.22      | 1.28  | $1.07 \times 10^{-5}$ |
|        | pH 10 | 1.20      | 1.23  | $5.56 \times 10^{-5}$ |
| TER-3  | pH 3  | 1.17      | 1.19  | –                     |
|        | PBS   | 1.01      | 0.94  | $4.46 \times 10^{-6}$ |
|        | pH 10 | 1.00      | 1.00  | $4.26 \times 10^{-6}$ |
| TER-4  | pH 3  | 1.05      | 1.03  | –                     |
|        | PBS   | 0.99      | 0.92  | $5.97 \times 10^{-7}$ |
|        | pH 10 | 0.98      | 0.99  | $1.10 \times 10^{-6}$ |
| TER-5  | pH 3  | 1.23      | 1.20  | –                     |
|        | PBS   | 1.00      | 1.03  | $1.17 \times 10^{-5}$ |
|        | pH 10 | 1.01      | 1.00  | $7.53 \times 10^{-6}$ |

From the table it is obvious that TER-4 copolymer, with the higher LMA content, has the lowest CAC, as well as  $I_1/I_3$  ratio (more hydrophobic domains). However, the DMAEMA content is also important since this is the responsive monomeric unit. The results clearly show the change, which is proportional to the composition of each copolymer in terms of the responsive DMAEMA content, and in combination with the content of hydrophobic LMA monomer.

**Table S3.** Structural characteristics of the P(DMAEMA-co-LMA-co-OEGMA) copolymer aggregates in aqueous media.

| Sample | T (°C) | pH    | Intensity (KHz/s) | R <sub>h</sub> (nm) | PDI  | ζ <sub>p</sub> (mV) |
|--------|--------|-------|-------------------|---------------------|------|---------------------|
| TER-1  | 25 °C  | pH 3  | 40                | 76                  | 0.6  | 26.5                |
|        |        | PBS   | 36                | 3 / 102             | 0.6  | –                   |
|        |        | pH 10 | 54                | 3 / 165             | 0.6  | –35.5               |
|        | 55 °C  | pH 3  | 43                | 71                  | 0.5  | –                   |
|        |        | PBS   | 567               | 326                 | 0.3  | –                   |
|        |        | pH 10 | 460               | 390                 | 0.2  | –                   |
| TER-2  | 25 °C  | pH 3  | 22                | 113                 | 0.6  | 12.5                |
|        |        | PBS   | 37                | 3 / 108             | 0.5  | –                   |
|        |        | pH10  | 21                | 3                   | 0.6  | –30.0               |
|        | 55 °C  | pH 3  | 568               | 112                 | 0.2  | –                   |
|        |        | PBS   | 6340              | 284                 | 9    | –                   |
|        |        | pH 10 | 3940              | 423                 | 0.07 | –                   |
| TER-3  | 25 °C  | pH 3  | 16                | 78                  | 0.7  | 5.0                 |
|        |        | PBS   | 54                | 5 / 173             | 0.4  | –                   |
|        |        | pH 10 | 93                | 5 / 106             | 0.4  | –18.0               |
|        | 55 °C  | pH 3  | 15                | 85                  | 0.6  | –                   |
|        |        | PBS   | 470               | 532                 | 3    | –                   |
|        |        | pH 10 | 335               | 19                  | 0.2  | –                   |
| TER-4  | 25 °C  | pH 3  | 67                | 5                   | 0.4  | 7.0                 |
|        |        | PBS   | 5360              | 98                  | 0.4  | –                   |
|        |        | pH 10 | 1016              | 11                  | 0.2  | –29.4               |
|        | 55 °C  | pH 3  | 60                | 4                   | 0.4  | –                   |
|        |        | PBS   | 41,500            | 502                 | 0.3  | –                   |
|        |        | pH 10 | 1661              | 12 / 99             | 0.3  | –                   |
| TER-5  | 25 °C  | pH 3  | 612               | 131                 | 0.2  | 74.2                |
|        |        | PBS   | 107               | 5 / 156             | 0.5  | –                   |
|        |        | pH 10 | 94                | 6                   | 0.4  | –32.0               |
|        | 55 °C  | pH 3  | 231               | 139                 | 0.2  | –                   |
|        |        | PBS   | 12,580            | 124                 | 21   | –                   |
|        |        | pH 10 | 911               | 13                  | 0.11 | –                   |

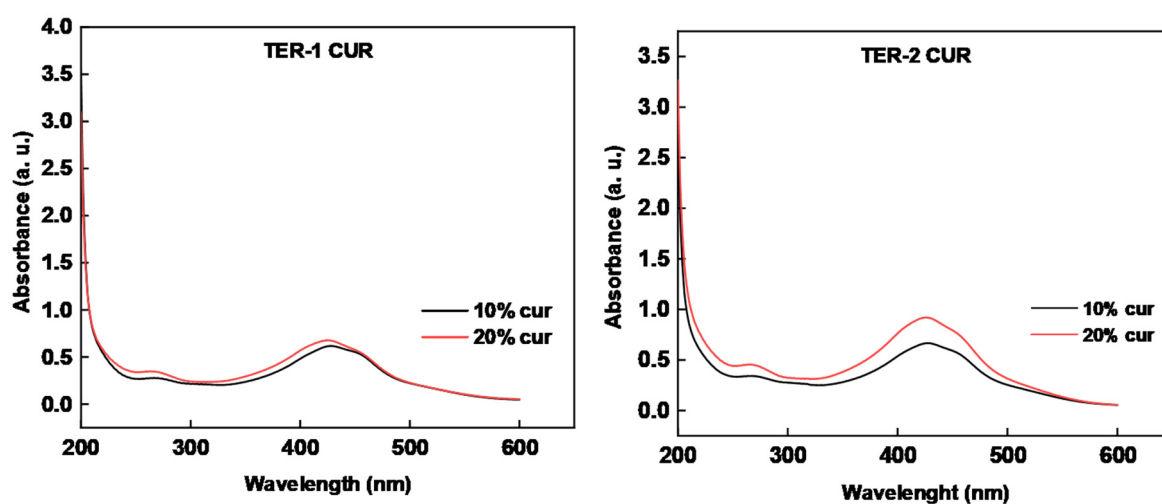

Figure S1. UV-Vis spectra for TER-1 (CUR) (left) and TER-2 (CUR) (right) mixed aggregates aqueous solutions from the THF protocol.

From the UV-Vis spectra for TER-1 and TER-2 copolymer CUR mixed aggregates it is observed that an increase of the curcumin content does not lead to a corresponding increase in the absorption signal. In TER-2 terpolymer, however, there is a larger variation (Figure S1).

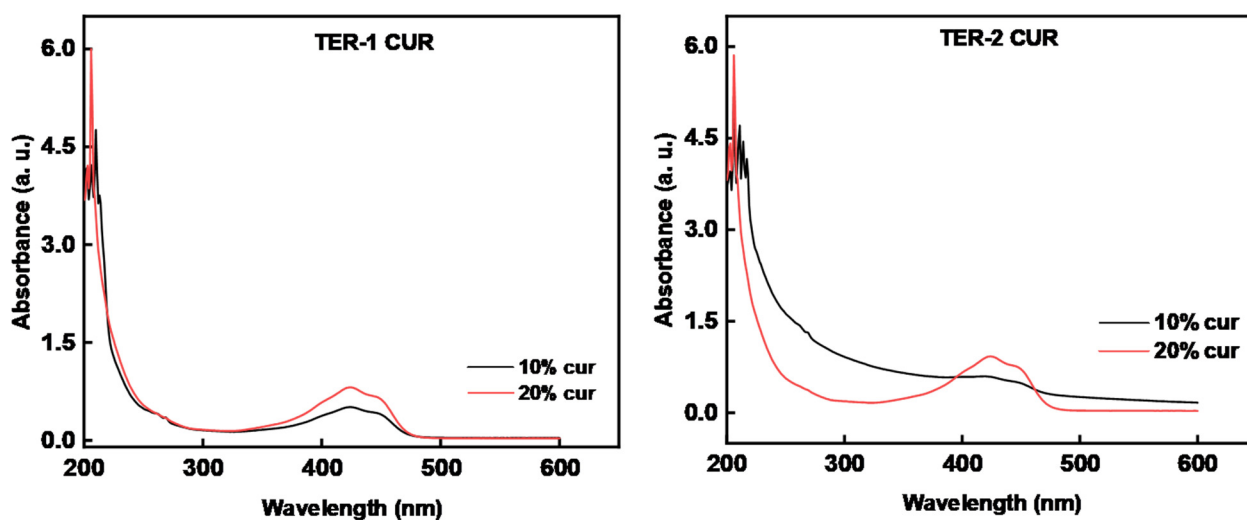

Figure S2. UV-Vis spectra for TER-1 (CUR) (left) and TER-2 (CUR) (right) mixed aggregates in aqueous media from the thin film protocol.

**Table S4.** Results on curcumin encapsulation efficiency for P(DMAEMA-co-LMA-co-OEGMA) copolymers for both encapsulation protocols.

| Sample* | Protocol  | Max CUR used (mg) | Max percentage of encapsulation (% w/w) | % encapsulation efficiency (EE) | % drug loading (DL) |
|---------|-----------|-------------------|-----------------------------------------|---------------------------------|---------------------|
| TER – 1 | THF       | 0.1               | 10                                      | 55.2                            | 0.55                |
|         |           | 0.2               | 20                                      | 49.7                            | 0.99                |
|         | Thin film | 0.1               | 10                                      | 83.4                            | 0.83                |
|         |           | 0.2               | 20                                      | 92.2                            | 1.8                 |
| TER – 2 | THF       | 0.11              | 10                                      | 68.0                            | 0.75                |
|         |           | 0.22              | 20                                      | 47.4                            | 1.04                |
|         | Thin film | 0.11              | 10                                      | 70.9                            | 0.78                |
|         |           | 0.22              | 20                                      | 95.7                            | 2.11                |
| TER – 3 | THF       | 0.29              | 10                                      | 69.9                            | 2.03                |
|         | Thin film | 0.29              | 10                                      | 71.7                            | 2.08                |
|         |           | 0.58              | 20                                      | 12.5                            | 0.72                |
| TER – 5 | THF       | 0.27              | 10                                      | 72.0                            | 1.95                |
|         | Thin film | 0.27              | 10                                      | 78.2                            | 2.11                |

\* 10 mg of each terpolymer were used for each preparation.

**Table S5.** DLS results from aqueous solutions the 1<sup>st</sup> and the 10<sup>th</sup> day from the preparation of the terpolymer – curcumin mixed aggregates.

| Sample  | Protocol | R <sub>h</sub> (nm) without CUR | R <sub>h</sub> (nm) with CUR (1 <sup>st</sup> day) | PDI (1 <sup>st</sup> day) | R <sub>h</sub> (nm) with CUR (10 <sup>th</sup> day) | PDI (10 <sup>th</sup> day) |
|---------|----------|---------------------------------|----------------------------------------------------|---------------------------|-----------------------------------------------------|----------------------------|
| TER – 1 | THF      | 3/102                           | 3/112                                              | 0.5                       | 4/104                                               | 0.5                        |
|         |          |                                 | 99                                                 | 0.5                       | 4/95                                                | 0.6                        |
| TER – 2 | THF      | 3/108                           | 93                                                 | 0.3                       | 104                                                 | 0.5                        |
|         |          |                                 | 73                                                 | 0.2                       | 81                                                  | 0.3                        |
| TER – 3 | THF      | 3/157                           | 152                                                | 0.3                       | 182                                                 | 0.3                        |
| TER – 5 | THF      | 5/156                           | 156                                                | 0.2                       | 173                                                 | 0.2                        |
